# Supplementary material
Source: PubMed Central journal article supplement (PMC4344404)
Supplement: NIHMS655449-supplement-1.pdf [file NIHMS655449-supplement-1.pdf]

## MATERIALS AND METHODS

Lp(a) levels measured after mipomersen treatment were compared with those of placebo. Lp(a) was measured using an isoform independent assay (MedPace, Siemens, BN™ II System) validated against a standard reference calibrator from the Northwest Lipid Research Clinic<sup>1</sup>, as described in each trial.<sup>2-5</sup>

## Statistics

Analyses were based on pooled data from the 4 phase 3 trials using the full analysis set (all randomized patients who received at least 1 injection of study drug and had a valid baseline with at least 1 post-baseline lipid assessment). Between-group differences in the mean percent change from baseline in Lp(a) at the primary efficacy timepoint (PET) were compared using a mixed model with a fixed effect for treatment and a random effect for study. PET was defined as date of the efficacy assessment closest to 14 days beyond the last study medication date. Spearman correlations analyses were conducted between percent change from baseline in Lp(a), LDL-C and apoB. All analyses were done using SAS (version 9.2).

## References

1. Marcovina SM, Albers JJ, Scanu AM, Kennedy H, Giaculli F, Berg K, Couderc R, Dati F, Rifai N, Sakurabayashi I, Tate JR, Steinmetz A. Use of a reference material proposed by the international federation of clinical chemistry and laboratory medicine to evaluate analytical methods for the determination of plasma lipoprotein(a). *Clin Chem*. 2000;46:1956-1967
2. Stein EA, Dufour R, Gagne C, Gaudet D, East C, Donovan JM, Chin W, Tribble DL, McGowan M. Apolipoprotein b synthesis inhibition with mipomersen in heterozygous familial hypercholesterolemia: Results of a randomized, double-blind, placebo-controlled trial to assess efficacy and safety as add-on therapy in patients with coronary artery disease. *Circulation*. 2012;126:2283-2292
3. McGowan MP, Tardif JC, Ceska R, Burgess LJ, Soran H, Gouni-Berthold I, Wagener G, Chasan-Taber S. Randomized, placebo-controlled trial of mipomersen in patients with severe hypercholesterolemia receiving maximally tolerated lipid-lowering therapy. *PloS One*. 2012;7:e49006
4. Raal FJ, Santos RD, Blom DJ, Marais AD, Charng MJ, Cromwell WC, Lachmann RH, Gaudet D, Tan JL, Chasan-Taber S, Tribble DL, Flaim JD, Crooke ST. Mipomersen, an apolipoprotein B synthesis inhibitor, for lowering of LDL cholesterol concentrations in patients with homozygous familial hypercholesterolaemia: A randomised, double-blind, placebo-controlled trial. *Lancet*. 2010;375:998-1006
5. Thomas GS, Cromwell WC, Ali S, Chin W, Flaim JD, Davidson M. Mipomersen, an apolipoprotein B synthesis inhibitor, reduces atherogenic lipoproteins in patients with severe hypercholesterolemia at high cardiovascular risk: A randomized, double-blind, placebo-controlled trial. *J Am Coll Cardiol*. 2013;62:2178-2184
