# Supplementary material
Source: PubMed Central journal article supplement (PMC4344404)
Supplement: NIHMS655449-supplement-2.pdf [file NIHMS655449-supplement-2.pdf]

Supplemental material

Supplemental Table. Patient Cardiovascular History by Study – Phase 3 Trials

| CV Diagnosis/Event           | HoFH          |                | Severe HC     |                | HeFH with CAD* |                | HC at high risk for CHD |                 |
|------------------------------|---------------|----------------|---------------|----------------|----------------|----------------|-------------------------|-----------------|
|                              | n (%)         |                | n (%)         |                | n (%)          |                | n (%)                   |                 |
|                              | PBO<br>(n=17) | MIPO<br>(n=34) | PBO<br>(n=18) | MIPO<br>(n=39) | PBO<br>(n=41)  | MIPO<br>(n=83) | PBO<br>(n=50)           | MIPO<br>(n=101) |
| Hypertension                 | 2 (11.8)      | 3 (8.8)        | -             | -              | -              | -              | -                       | -               |
| Revascularization            | 4 (23.5)      | 10 (29.4)      | -             | -              | -              | -              | -                       | -               |
| Atherosclerotic disease      | 11 (64.7)     | 19 (55.9)      | -             | -              | -              | -              | -                       | -               |
| Aortic valve stenosis        | 10 (58.8)     | 16 (47.1)      | -             | -              | 2 (4.9)        | 5 (6.0)        | -                       | -               |
| Aortic valve replacement     | 1 (5.9)       | 3 (8.8)        | -             | -              | -              | -              | -                       | -               |
| Angina                       | -             | -              | 4 (22.2)      | 11 (28.2)      | 8 (19.5)       | 27 (32.5)      | 5 (10.0)                | 9 (8.9)         |
| Cardiovascular Heart Disease | -             | -              | 13 (72.2)     | 28 (71.8)      | -              | -              | 21 (42.0)               | 50 (49.5)       |
| MI                           | -             | -              | 3 (16.7)      | 8 (20.5)       | 11 (26.8)      | 34 (41.0)      | 11 (22.0)               | 17 (16.8)       |
| CABG                         | -             | -              | 6 (33.3)      | 12 (30.8)      | 22 (53.6)      | 37 (44.6)      | 4 (8.0)                 | 14 (13.9)       |
| PCI                          | -             | -              | 1 (5.6)       | 4 (10.3)       | 13 (31.7)      | 25 (30.1)      | 4 (8.0)                 | 18 (17.8)       |
| CAD w/out event              | -             | -              | 5 (27.8)      | 11 (28.2)      | 7 (17.1)       | 19 (22.9)      | 6 (12.0)                | 12 (11.9)       |
| Peripheral Artery Disease    | -             | -              | 2 (11.1)      | 1 (2.6)        | 6 (14.6)       | 8 (9.6)        | 1 (2.0)                 | 5 (5.0)         |
| Abdominal Aortic Aneurysm    | -             | -              | 0 (0.0)       | 1 (2.6)        | -              | -              | 1 (2.0)                 | 0 (0.0)         |
| Carotid Artery Disease       | -             | -              | 5 (27.8)      | 6 (15.4)       | -              | -              | 1 (2.0)                 | 8 (7.9)         |

--Data not reported. PBO=Placebo; MIPO=mipomersen; \* By definition all patients in this cohort had a history of CAD, data based on safety set analysis. (The data from this study is based on the safety analysis set which includes 1 more subject in the MIPO arm than the full analysis set that the other studies are based on).
